# Supplementary material for: Machine learning-based detection of acute psychosocial stress from body posture and movements
Source: PubMed Central journal article supplement (PMC11375162; doi:10.1038/s41598-024-59043-1), 2024-04-08
Supplement: 41598_2024_59043_MOESM1_ESM.pdf [file 41598_2024_59043_MOESM1_ESM.pdf]

# Supplementary Information for Paper “StressPose - Detection of Acute Psychosocial Stress from Body Posture and Movements”

R. Richer, V. Koch, L. Abel, F. Hauck, M. Kurz, V. Ringgold, V. Müller,  
A. Küderle, L. Schindler-Gmelch, N. Rohleder, B. M. Eskofier

## 1 Additional Information

### Perception Neuron Preprocessing Pipeline

As the motion capture data were suffering from sensor drifts in position and rotation, we first preprocessed the data before further processing. We removed position drifts by filtering the `pos` channel with a third-order Butterworth high-pass filter and a cutoff frequency of  $f_c = 0.01$  Hz. Due to the hierarchical structure of the motion capture data format, we only filtered data from the root node (*Hips*) as the positions of all other body parts were defined relative to the root node. As a similar approach was not possible to filter the rotation drifts of Euler angles, we developed the following rotation drift filtering pipeline (Figure 1):

1. Unwrap the rotation values given as radian phases  $\varphi, \varphi \in [-\pi, +\pi]$  by adding multiples of  $\pm 2\pi$  such that adjacent angle differences  $\Delta\varphi$  are never greater than  $\pi$ .
2. Convert rotation data from Euler angles to quaternions.
3. Approximate the rotation drift by applying high-pass Butterworth filters with cutoff frequencies  $f_c$  in the range 0.01–0.06 Hz and subtracting the filtered data from the original data.
4. Remove drift by rotating the original data by the approximated drift.
5. Convert quaternions back to Euler angles.

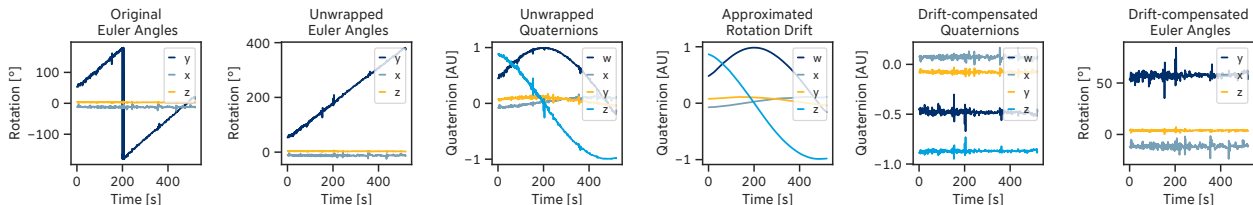

Filtering pipeline to remove rotation drifts from the motion capture data.

Since the rotation drifts were different for each recording regarding the magnitude and the affected body parts, we empirically determined and applied custom filter parameters for each recording. A list of the individual filter parameters can be found in the dataset description [1, 2, 3]. Afterwards, we computed the frame-wise global position `pos_global` of each body part from the drift-corrected data according to

$$x'^j = \mathbf{M}_{global}^j \cdot x^j, \quad (1)$$

where  $x^j, x \in \mathbb{R}^4$  and  $x'^j, x' \in \mathbb{R}^4$  describe the *local* and *global* position for one body part  $j$  in homogeneous coordinates, respectively, and  $\mathbf{M}_{global}^j, \mathbf{M} \in \mathbb{R}^{4 \times 4}$  is the transformation matrix consisting of rotation  $R$  and translation  $T$  (Equation 2).

$$\mathbf{M}_{global} = \begin{bmatrix} R_{11} & R_{12} & R_{13} & T_x \\ R_{21} & R_{22} & R_{23} & T_y \\ R_{31} & R_{32} & R_{33} & T_z \\ 0 & 0 & 0 & 1 \end{bmatrix} \quad (2)$$

Due to the hierarchical structure for the motion capture data format, the global transformation matrix  $\mathbf{M}_{global}^j$  for a given body part  $j$  is obtained by recursively multiplying the local transformation matrix  $\mathbf{M}_{local}^j$

with the global transformation matrix of the parent  $\mathbf{M}_{global}^{j-1}$  as depicted in Equation 3, where  $i = 0$  indicates the root node of the hierarchy (*Hips*).

$$\mathbf{M}_{global}^j = \prod_{i=0}^j \mathbf{M}_{local}^i \quad (3)$$

Additionally, we extracted the global rotation `rot_glo` as Euler angles from the rotation information  $R$  in the global transformation matrix  $\mathbf{M}_{global}$ .

## 2 Additional Tables

### Overview on Extracted Generic Features

#### Supplementary Table S1.1: Pilot Study

*Pilot Study:* Overview of generic features computed per body part (group) from the *Perception Neuron* system.

| Body Part (Group)    | Channels |         |     | Axes      |         | Generic Features                       |
|----------------------|----------|---------|-----|-----------|---------|----------------------------------------|
|                      | vel      | ang_vel | rot | $x, y, z$ | L2-norm |                                        |
| Head                 | ✓        | ✓       | ✓   | ✓         | ✓       | <i>all</i>                             |
| Chest                | ✓        | ✓       | ✓   | ✓         | ✓       |                                        |
| {Left/Right} Hand    | ✓        | ✓       | ✓   | ✓         | ✓       |                                        |
| {Left/Right} ForeArm | ✓        | ✓       | ✓   | ✗         | ✓       | mean, std, cov, max_val                |
| {Left/Right} Leg     | ✓        | ✓       | ✓   | ✗         | ✓       |                                        |
| Trunk                | ✓        | ✓       | ✗   | ✗         | ✓       | <i>all, except z_cross and m_cross</i> |
| Upper Extremities    | ✓        | ✓       | ✗   | ✗         | ✓       |                                        |
| Lower Extremities    | ✓        | ✓       | ✗   | ✗         | ✓       |                                        |
| Total Body           | ✓        | ✓       | ✗   | ✗         | ✓       |                                        |

#### Supplementary Table S1.2: Main Study

*Main Study:* Overview of generic features computed per body part (group) from the *Xsens* system.

| Body Part (Group)    | Channels |     |         | Axes |           | Generic Features |                                        |
|----------------------|----------|-----|---------|------|-----------|------------------|----------------------------------------|
|                      | acc      | vel | ang_vel | rot  | $x, y, z$ |                  | L2-norm                                |
| Head                 | ✓        | ✓   | ✓       | ✓    | ✓         | ✓                | <i>all</i>                             |
| Chest (T8)           | ✓        | ✓   | ✓       | ✗    | ✓         | ✓                |                                        |
| {Left/Right} Hand    | ✓        | ✓   | ✓       | ✓    | ✓         | ✓                |                                        |
| {Left/Right} ForeArm | ✓        | ✓   | ✓       | ✓    | ✗         | ✓                | mean, std, cov, max_val                |
| {Left/Right} Leg     | ✓        | ✓   | ✓       | ✓    | ✗         | ✓                |                                        |
| Trunk                | ✓        | ✓   | ✓       | ✗    | ✗         | ✓                | <i>all, except z_cross and m_cross</i> |
| Upper Extremities    | ✓        | ✓   | ✓       | ✗    | ✗         | ✓                |                                        |
| Lower Extremities    | ✓        | ✓   | ✓       | ✗    | ✗         | ✓                |                                        |
| Total Body           | ✓        | ✓   | ✓       | ✗    | ✗         | ✓                |                                        |

## Overview on Extracted Expert Features

### Supplementary Table S1.3: Pilot Study

*Pilot Study:* Overview of expert features computed per body part (group) from the *Perception Neuron* system.

| Body Part (Group)      | Channels |     |         | Expert Features                      |
|------------------------|----------|-----|---------|--------------------------------------|
|                        | rot_glo  | vel | ang_vel |                                      |
| Chest                  | ✗        | ✓   | ✓       | Static Periods                       |
| Left Hand & Right Hand | ✗        | ✓   | ✓       |                                      |
| Head                   | ✓        | ✓   | ✓       | Absolute Movement,<br>Static Periods |
| Trunk                  | ✓        | ✓   | ✓       |                                      |
| Upper Extremities      | ✓        | ✓   | ✓       |                                      |
| Lower Extremities      | ✓        | ✓   | ✓       |                                      |

### Supplementary Table S1.4: Main Study

*Main Study:* Overview of expert features computed per body part (group) from the *Xsens* system.

| Body Part (Group)      | Channels |         | Expert Features                      |
|------------------------|----------|---------|--------------------------------------|
|                        | vel      | ang_vel |                                      |
| Chest (T8)             | ✓        | ✓       | Static Periods                       |
| Left Hand & Right Hand | ✓        | ✓       |                                      |
| Head                   | ✓        | ✓       | Absolute Movement,<br>Static Periods |
| Trunk                  | ✓        | ✓       |                                      |
| Upper Extremities      | ✓        | ✓       |                                      |
| Lower Extremities      | ✓        | ✓       |                                      |

## Supplementary Table S2: Hyperparameter Search Space

Grid-search space for the individual feature selection and classification algorithms of the *StressPose* pipeline.

| Type              | Algorithm                | Parameter                               | Values                                                                   |
|-------------------|--------------------------|-----------------------------------------|--------------------------------------------------------------------------|
| Feature Selection | SkB                      | k                                       | {2, 4, ..., 18}                                                          |
|                   | RFE                      | n_features                              | {2, 4, ..., 18}                                                          |
| Classifier        | NB                       | –                                       | –                                                                        |
|                   | kNN                      | n_neighbors                             | {1, 3, ..., 19}                                                          |
|                   |                          | weights                                 | ["uniform", "distance"]                                                  |
|                   | DT                       | criterion                               | ["gini", "entropy"]                                                      |
|                   |                          | max_depth                               | {1, 3, ..., 19}                                                          |
|                   |                          | min_samples_leaf                        | {0.1, 0.2, 0.3, 0.4}                                                     |
|                   |                          | min_samples_split                       | {0.1, 0.2, ..., 0.7}                                                     |
|                   | SVM-lin                  | max_features                            | {0.1, 0.2, 0.3, 0.4, 0.5, "auto", "log2", None}                          |
|                   |                          | C                                       | { $10^{-2}$ , $10^{-1}$ , ..., $10^4$ }                                  |
|                   |                          | SVM-rbf                                 | C                                                                        |
|                   | gamma                    |                                         | { $10^{-4}$ , $10^{-3}$ , ..., $10^3$ }                                  |
|                   | SVM-poly                 | C                                       | { $10^{-2}$ , $10^{-1}$ , ..., $10^4$ }                                  |
|                   |                          | degree                                  | {2, 3, 4, 5}                                                             |
|                   | MLP                      | hidden_layer_sizes                      | [(1), (1, 1), (1, 1, 1), (2), (2, 2), (2, 2, 2), (5), (5, 5), (5, 5, 5)] |
|                   |                          | activation                              | ["identity", "tanh", "relu"]                                             |
|                   |                          | solver                                  | ["lbfgs", "adam"]                                                        |
| alpha             |                          | { $10^{-2}$ , $10^{-1}$ , ..., $10^2$ } |                                                                          |
| Ada               | base_estimator           | [DT, SVC]                               |                                                                          |
|                   | n_estimators             | {10, 20, ..., 500}                      |                                                                          |
| RF                | learning_rate            | {0.01, 0.02, ..., 0.1, 0.2, ..., 1.5}   |                                                                          |
|                   | criterion                | ["entropy"]                             |                                                                          |
|                   | max_depth                | {4, 8, 12, ..., 48, None}               |                                                                          |
|                   | max_features             | {0.1, 0.2, 0.3, 0.4, "sqrt"}            |                                                                          |
|                   | min_samples_leaf         | {0.05, 0.1, 0.15, 0.20}                 |                                                                          |
|                   | min_samples_split        | {0.1, 0.2, 0.3, 0.4}                    |                                                                          |
|                   | min_weight_fraction_leaf | {0.1, 0.2, 0.3, 0.4}                    |                                                                          |
|                   | max_leaf_nodes           | {2, 4, ..., 18}                         |                                                                          |
|                   | min_impurity_decrease    | {0, 0.01, ..., 0.09}                    |                                                                          |
|                   | n_estimators             | {10, 20, ..., 390}                      |                                                                          |
| ccp_alpha         | {0, 0.01, ..., 0.09}     |                                         |                                                                          |

## Supplementary Table S3: Statistical Test Results – *Pilot Study*

### Features over entire (f-)TSST

Results of statistical tests of extracted body posture and movement features between TSST and f-TSST from the *Pilot Study*. p-values are corrected for multiple comparisons using the Bonferroni method. *Note*: Only motion features with statistically significant ( $p < 0.05$ ) differences are shown.

| Feature Type | Body Part              | Channel           | Type                    | Metric            | W                 | p         | Hedges' g |        |
|--------------|------------------------|-------------------|-------------------------|-------------------|-------------------|-----------|-----------|--------|
| Expert       | Lower Extremities      | Ang. Vel.         | Static Periods          | Std. Duration (s) | 0                 | <0.001*** | 0.746     |        |
|              |                        |                   |                         | Max. Duration (s) | 0                 | <0.001*** | 0.741     |        |
|              |                        |                   |                         | Mean Duration (s) | 0                 | <0.001*** | 0.934     |        |
| Generic      | Right Fore Arm         | Ang. Vel.         | CoV                     | CoV               | 0                 | <0.001*** | 1.421     |        |
|              | Right Hand             | Ang. Vel.         | CoV                     | CoV               | 0                 | <0.001*** | 1.421     |        |
| Expert       | Head                   | Velocity          | Static Periods          | Std. Duration (s) | 0                 | <0.001*** | 1.159     |        |
|              | Left Hand & Right Hand | Velocity          | Static Periods          | Std. Duration (s) | 0                 | <0.001*** | 1.122     |        |
|              | Head                   | Velocity          | Static Periods          | Mean Duration (s) | 0                 | <0.001*** | 1.065     |        |
|              | Left Hand & Right Hand | Velocity          | Static Periods          | Mean Duration (s) | 0                 | <0.001*** | 1.020     |        |
|              | Lower Extremities      | Velocity          | Static Periods          | Std. Duration (s) | 0                 | <0.001*** | 0.843     |        |
|              | Head                   | Ang. Vel.         | Static Periods          | Std. Duration (s) | 0                 | <0.001*** | 1.066     |        |
|              |                        |                   |                         | Mean Duration (s) | 0                 | <0.001*** | 1.524     |        |
|              |                        |                   |                         | Max. Duration (s) | 0                 | <0.001*** | 0.904     |        |
|              |                        | Lower Extremities | Velocity                | Static Periods    | Mean Duration (s) | 0         | <0.001*** | 0.659  |
|              | Generic                | Right Fore Arm    | Ang. Vel.               | Mean              | Mean              | 1         | 0.002**   | -1.549 |
| Expert       | Chest                  | Ang. Vel.         | Static Periods          | Mean Duration (s) | 1                 | 0.002**   | 1.496     |        |
| Generic      | Right Fore Arm         | Velocity          | Mean                    | Mean              | 1                 | 0.002**   | -1.085    |        |
|              | Right Hand             | Ang. Vel.         | Mean                    | Mean              | 1                 | 0.002**   | -1.549    |        |
| Expert       | Lower Extremities      | Velocity          | Static Periods          | Max. Duration (s) | 1                 | 0.002**   | 1.064     |        |
|              | Left Hand & Right Hand | Velocity          | Static Periods          | Max. Duration (s) | 1                 | 0.002**   | 1.089     |        |
|              | Upper Extremities      | Velocity          | Static Periods          | Ratio (%)         | 1                 | 0.002**   | 1.321     |        |
| Generic      | Right Hand             | Ang. Vel.         | Abs. Energy             | Abs. Energy       | 1                 | 0.002**   | -0.957    |        |
| Expert       | Head                   | Ang. Vel.         | Static Periods          | Ratio (%)         | 1                 | 0.002**   | 1.478     |        |
|              | Trunk                  | Ang. Vel.         | Static Periods          | Mean Duration (s) | 2                 | 0.002**   | 1.283     |        |
|              | Chest                  | Ang. Vel.         | Static Periods          | Std. Duration (s) | 3                 | 0.004**   | 0.963     |        |
|              | Trunk                  | Ang. Vel.         | Static Periods          | Max. Duration (s) | 3                 | 0.004**   | 1.499     |        |
|              |                        |                   |                         | Ratio (%)         | 3                 | 0.004**   | 1.375     |        |
|              | Lower Extremities      | Ang. Vel.         | Static Periods          | Ratio (%)         | 3                 | 0.004**   | 0.978     |        |
|              | Left Hand & Right Hand | Ang. Vel.         | Static Periods          | Mean Duration (s) | 3                 | 0.004**   | 0.888     |        |
|              | Trunk                  | Ang. Vel.         | Static Periods          | Std. Duration (s) | 3                 | 0.004**   | 1.181     |        |
|              | Head                   | Velocity          | Static Periods          | Max. Duration (s) | 3                 | 0.004**   | 1.168     |        |
|              | Trunk                  | Velocity          | Static Periods          | Max. Duration (s) | 4                 | 0.006**   | 1.097     |        |
|              | Left Hand & Right Hand | Velocity          | Static Periods          | Ratio (%)         | 4                 | 0.006**   | 1.242     |        |
|              | Upper Extremities      | Velocity          | Static Periods          | Max. Duration (s) | 4                 | 0.006**   | 1.444     |        |
|              | Lower Extremities      | Velocity          | Static Periods          | Ratio (%)         | 5                 | 0.008**   | 0.980     |        |
|              | Chest                  | Ang. Vel.         | Static Periods          | Max. Duration (s) | 5                 | 0.008**   | 1.120     |        |
|              | Head                   | Velocity          | Static Periods          | Ratio (%)         | 5                 | 0.008**   | 1.230     |        |
|              | Upper Extremities      | Velocity          | Static Periods          | Mean Duration (s) | 6                 | 0.011*    | 1.622     |        |
|              | Trunk                  | Velocity          | Static Periods          | Std. Duration (s) | 6                 | 0.011*    | 1.376     |        |
|              | Left Hand & Right Hand | Ang. Vel.         | Static Periods          | Std. Duration (s) | 6                 | 0.011*    | 0.581     |        |
|              |                        |                   |                         | Max. Duration (s) | 6                 | 0.011*    | 0.772     |        |
|              | Chest                  | Velocity          | Static Periods          | Max. Duration (s) | 7                 | 0.015*    | 1.137     |        |
|              | Upper Extremities      | Ang. Vel.         | Static Periods          | Ratio (%)         | 7                 | 0.015*    | 1.433     |        |
|              | Left Hand & Right Hand | Ang. Vel.         | Static Periods          | Ratio (%)         | 7                 | 0.015*    | 1.484     |        |
| Generic      | Left Fore Arm          | Rotation          | Max. Value              | Max. Value        | 7                 | 0.015*    | -1.012    |        |
| Expert       | Chest                  | Ang. Vel.         | Static Periods          | Ratio (%)         | 7                 | 0.015*    | 1.296     |        |
|              |                        | Velocity          | Static Periods          | Std. Duration (s) | 8                 | 0.020*    | 1.341     |        |
| Generic      | Trunk                  | Velocity          | Mean                    | Mean              | 8                 | 0.020*    | -0.903    |        |
| Expert       | Trunk                  | Velocity          | Static Periods          | Mean Duration (s) | 8                 | 0.020*    | 1.462     |        |
|              |                        | Velocity          | Static Periods          | Std. Duration (s) | 9                 | 0.027*    | 1.528     |        |
| Generic      | Total Body             | Ang. Vel.         | CoV                     | CoV               | 9                 | 0.027*    | 0.869     |        |
| Expert       | Upper Extremities      | Ang. Vel.         | Static Periods          | Counts per Minute | 9                 | 0.027*    | 1.281     |        |
| Generic      | Left Fore Arm          | Rotation          | Std. Dev.               | Std. Dev.         | 10                | 0.035*    | -1.083    |        |
|              | Total Body             | Velocity          | Mean                    | Mean              | 10                | 0.035*    | -0.856    |        |
|              | Head                   | Rotation          | Zero Crossings          | Zero Crossings    | 10                | 0.035*    | -1.063    |        |
|              | Trunk                  | Ang. Vel.         | CoV                     | CoV               | 11                | 0.045*    | 0.901     |        |
|              | Total Body             | Ang. Vel.         | FFT Aggregated Skewness | FFT Skewness      | 11                | 0.045*    | -0.968    |        |

## Supplementary Table S4: Classification Results – *Pilot Study*

### Features over entire (f-)TSST

Mean  $\pm$  standard deviation of classification performance metrics over the 5-fold model evaluation CV with features computed over the complete (f-)TSST procedure. For each evaluated classifier, the classification pipeline combination with the highest mean accuracy is shown. The classification pipelines scoring the highest metrics are highlighted in **bold**.

| Scaler   | Feature Selection | Classifier | Accuracy [%]                     | F1-score [%]                     | Precision [%]                    |
|----------|-------------------|------------|----------------------------------|----------------------------------|----------------------------------|
| Min-Max  | RFE               | RF         | <b>92.5 <math>\pm</math> 6.1</b> | <b>92.7 <math>\pm</math> 6.1</b> | 92.0 $\pm$ 9.8                   |
| Standard | RFE               | kNN        | 87.5 $\pm$ 0.0                   | 86.3 $\pm$ 1.3                   | <b>96.0 <math>\pm</math> 8.0</b> |
| Standard | SkB               | MLP        | 85.0 $\pm$ 12                    | 85.4 $\pm$ 10                    | 88.0 $\pm$ 10                    |
| Min-Max  | SkB               | Ada        | 82.5 $\pm$ 6.1                   | 80.4 $\pm$ 8.3                   | 91.0 $\pm$ 11                    |
| Standard | SkB               | SVM        | 82.5 $\pm$ 10                    | 83.8 $\pm$ 8.7                   | 80.0 $\pm$ 12                    |
| Standard | SkB               | NB         | 80.0 $\pm$ 10                    | 78.7 $\pm$ 9.9                   | 88.0 $\pm$ 10                    |
| Min-Max  | RFE               | DT         | 77.5 $\pm$ 9.4                   | 73.9 $\pm$ 17                    | 84.3 $\pm$ 13                    |

## Statistical Test Results – *Main Study*

Supplementary Table S5.1: Features over entire (f-)TSST

Results of statistical tests of extracted body posture and movement features between TSST and f-TSST from the *Main Study*. p-values are corrected for multiple comparisons using the Bonferroni method. *Note*: Only motion features with statistically significant ( $p < 0.05$ ) differences are shown.

| Feature Type                      | Body Part                         | Channel               | Type                     | Metric                   | W                        | p         | Hedges' g |        |
|-----------------------------------|-----------------------------------|-----------------------|--------------------------|--------------------------|--------------------------|-----------|-----------|--------|
| <i>Expert</i>                     | <i>Upper Extremities</i>          | <i>Ang. Vel.</i>      | <i>Static Periods</i>    | <i>Mean Duration (s)</i> | 17                       | <0.001*** | 0.823     |        |
|                                   | <i>Left Hand &amp; Right Hand</i> | <i>Ang. Vel.</i>      | <i>Static Periods</i>    | <i>Mean Duration (s)</i> | 17                       | <0.001*** | 0.825     |        |
| <i>Generic</i>                    | <i>Total Body</i>                 | <i>Ang. Vel.</i>      | <i>Static Periods</i>    | <i>Ratio (%)</i>         | 34                       | <0.001*** | 0.711     |        |
|                                   | <i>Head</i>                       | <i>Ang. Vel.</i>      | <i>CoV</i>               | <i>CoV</i>               | 35                       | <0.001*** | 0.611     |        |
| <i>Expert</i>                     | <i>Upper Extremities</i>          | <i>Ang. Vel.</i>      | <i>Static Periods</i>    | <i>Ratio (%)</i>         | 39                       | <0.001*** | 0.618     |        |
|                                   | <i>Total Body</i>                 | <i>Ang. Vel.</i>      | <i>Static Periods</i>    | <i>Mean Duration (s)</i> | 39                       | <0.001*** | 0.906     |        |
|                                   | <i>Left Hand &amp; Right Hand</i> | <i>Ang. Vel.</i>      | <i>Static Periods</i>    | <i>Ratio (%)</i>         | 47                       | <0.001*** | 0.581     |        |
|                                   | <i>Total Body</i>                 | <i>Ang. Vel.</i>      | <i>Static Periods</i>    | <i>Std. Duration (s)</i> | 50                       | <0.001*** | 0.858     |        |
|                                   | <i>Head</i>                       | <i>Ang. Vel.</i>      | <i>Static Periods</i>    | <i>Ratio (%)</i>         | 56                       | <0.001*** | 0.672     |        |
|                                   | <i>Total Body</i>                 | <i>Ang. Vel.</i>      | <i>Static Periods</i>    | <i>Max. Duration (s)</i> | 58                       | <0.001*** | 0.799     |        |
|                                   | <i>Left Hand &amp; Right Hand</i> | <i>Ang. Vel.</i>      | <i>Static Periods</i>    | <i>Std. Duration (s)</i> | 62                       | <0.001*** | 0.598     |        |
|                                   | <i>Upper Extremities</i>          | <i>Ang. Vel.</i>      | <i>Static Periods</i>    | <i>Std. Duration (s)</i> | 63                       | <0.001*** | 0.757     |        |
|                                   | <i>Trunk</i>                      | <i>Ang. Vel.</i>      | <i>Static Periods</i>    | <i>Std. Duration (s)</i> | 68                       | <0.001*** | 0.696     |        |
|                                   |                                   |                       |                          | <i>Mean Duration (s)</i> | 70                       | <0.001*** | 0.646     |        |
|                                   | <i>Generic</i>                    | <i>Head</i>           | <i>Ang. Vel.</i>         | <i>Entropy</i>           | <i>Entropy</i>           | 73        | <0.001*** | -0.548 |
|                                   | <i>Expert</i>                     | <i>Trunk</i>          | <i>Ang. Vel.</i>         | <i>Static Periods</i>    | <i>Ratio (%)</i>         | 73        | <0.001*** | 0.524  |
| <i>Total Body</i>                 |                                   | <i>Velocity</i>       | <i>Static Periods</i>    | <i>Std. Duration (s)</i> | 74                       | <0.001*** | 0.834     |        |
|                                   |                                   |                       |                          | <i>Max. Duration (s)</i> | 40                       | <0.001*** | 0.835     |        |
|                                   | <i>Head</i>                       | <i>Ang. Vel.</i>      | <i>Static Periods</i>    | <i>Mean Duration (s)</i> | 76                       | 0.001**   | 0.857     |        |
|                                   | <i>T8</i>                         | <i>Ang. Vel.</i>      | <i>Static Periods</i>    | <i>Counts per Minute</i> | 79                       | 0.001**   | -0.601    |        |
| <i>Generic</i>                    | <i>Upper Extremities</i>          | <i>Velocity</i>       | <i>Static Periods</i>    | <i>Std. Duration (s)</i> | 81                       | 0.002**   | 0.780     |        |
|                                   | <i>Head</i>                       | <i>Ang. Vel.</i>      | <i>Mean</i>              | <i>Mean</i>              | 82                       | 0.002**   | -0.475    |        |
| <i>Expert</i>                     | <i>Head</i>                       | <i>Ang. Vel.</i>      | <i>Static Periods</i>    | <i>Max. Duration (s)</i> | 85                       | 0.003**   | 0.637     |        |
|                                   | <i>Upper Extremities</i>          | <i>Velocity</i>       | <i>Static Periods</i>    | <i>Ratio (%)</i>         | 87                       | 0.003**   | 0.553     |        |
|                                   | <i>Trunk</i>                      | <i>Ang. Vel.</i>      | <i>Static Periods</i>    | <i>Max. Duration (s)</i> | 89.500                   | 0.004**   | 0.692     |        |
|                                   |                                   |                       | <i>Velocity</i>          | <i>Static Periods</i>    | <i>Max. Duration (s)</i> | 89.500    | 0.004**   | 0.664  |
|                                   | <i>Left Hand &amp; Right Hand</i> | <i>Ang. Vel.</i>      | <i>Static Periods</i>    | <i>Max. Duration (s)</i> | 90.500                   | 0.004**   | 0.408     |        |
|                                   | <i>Total Body</i>                 | <i>Velocity</i>       | <i>Static Periods</i>    | <i>Ratio (%)</i>         | 91                       | 0.004**   | 0.528     |        |
|                                   | <i>Head</i>                       | <i>Ang. Vel.</i>      | <i>Static Periods</i>    | <i>Std. Duration (s)</i> | 92                       | 0.005**   | 0.776     |        |
|                                   | <i>Trunk</i>                      | <i>Velocity</i>       | <i>Static Periods</i>    | <i>Std. Duration (s)</i> | 92                       | 0.005**   | 0.672     |        |
|                                   | <i>Upper Extremities</i>          | <i>Velocity</i>       | <i>Static Periods</i>    | <i>Max. Duration (s)</i> | 63                       | 0.005**   | 0.821     |        |
|                                   |                                   |                       |                          | <i>Mean Duration (s)</i> | 94                       | 0.006**   | 0.660     |        |
|                                   | <i>Head</i>                       | <i>Velocity</i>       | <i>Static Periods</i>    | <i>Max. Duration (s)</i> | 95                       | 0.006**   | 0.742     |        |
|                                   | <i>Total Body</i>                 | <i>Velocity</i>       | <i>Static Periods</i>    | <i>Mean Duration (s)</i> | 96                       | 0.007**   | 0.734     |        |
| <i>Left Hand &amp; Right Hand</i> | <i>Velocity</i>                   | <i>Static Periods</i> | <i>Mean Duration (s)</i> | 102                      | 0.011*                   | 0.589     |           |        |
|                                   |                                   |                       | <i>Std. Duration (s)</i> | 104                      | 0.013*                   | 0.617     |           |        |
|                                   |                                   |                       | <i>Max. Duration (s)</i> | 104                      | 0.013*                   | 0.614     |           |        |
| <i>Generic</i>                    | <i>Upper Extremities</i>          | <i>Ang. Vel.</i>      | <i>Static Periods</i>    | <i>Max. Duration (s)</i> | 81                       | 0.016*    | 0.631     |        |
|                                   | <i>Head</i>                       | <i>Acc.</i>           | <i>Mean</i>              | <i>Mean</i>              | 107                      | 0.016*    | -0.478    |        |
| <i>Expert</i>                     | <i>Head</i>                       | <i>Velocity</i>       | <i>Static Periods</i>    | <i>Std. Duration (s)</i> | 107                      | 0.016*    | 0.669     |        |
|                                   | <i>Left Hand &amp; Right Hand</i> | <i>Velocity</i>       | <i>Static Periods</i>    | <i>Ratio (%)</i>         | 108                      | 0.018*    | 0.521     |        |
|                                   | <i>T8</i>                         | <i>Ang. Vel.</i>      | <i>Static Periods</i>    | <i>Mean Duration (s)</i> | 119                      | 0.040*    | 0.510     |        |
|                                   | <i>Total Body</i>                 | <i>Ang. Vel.</i>      | <i>Static Periods</i>    | <i>Counts per Minute</i> | 120                      | 0.043*    | 0.453     |        |

## Supplementary Table S5.2: Features per Phase

Results of statistical tests of extracted body posture and movement features between TSST and f-TSST from the *Main Study*, computed separately over *Interview* and *Mental Arithmetics* phases of the (f-)TSST. p-values are corrected for multiple comparisons using the Bonferroni method. *Note*: Only motion features with statistically significant ( $p < 0.05$ ) differences are shown.

| Phase                                         | Feature Type | Body Part              | Channel           | Type              | Metric            | W       | p         | Hedges' g |
|-----------------------------------------------|--------------|------------------------|-------------------|-------------------|-------------------|---------|-----------|-----------|
| <i>Mental Arithmetics</i><br><i>Interview</i> | Generic      | Head                   | Ang. Vel.         | Entropy           | Entropy           | 51      | <0.001*** | -0.722    |
|                                               |              | Trunk                  | Ang. Vel.         | Static Periods    | Max. Duration (s) | 68      | <0.001*** | 0.873     |
|                                               | Expert       | Upper Extremities      | Ang. Vel.         | Static Periods    | Std. Duration (s) | 68      | <0.001*** | 0.770     |
|                                               |              | Left Hand & Right Hand | Ang. Vel.         | Static Periods    | Std. Duration (s) | 72      | 0.001**   | 0.838     |
|                                               |              |                        | Max. Duration (s) | 77                | 0.002**           | 0.837   |           |           |
|                                               |              | Upper Extremities      | Velocity          | Static Periods    | Mean Duration (s) | 82      | 0.004**   | 0.654     |
|                                               |              | Left Hand & Right Hand | Velocity          | Static Periods    | Mean Duration (s) | 88      | 0.007**   | 0.620     |
|                                               |              |                        | Ang. Vel.         | Static Periods    | Mean Duration (s) | 88      | 0.007**   | 0.754     |
|                                               |              | Trunk                  | Ang. Vel.         | Static Periods    | Std. Duration (s) | 89      | 0.007**   | 0.770     |
|                                               |              | Upper Extremities      | Ang. Vel.         | Static Periods    | Max. Duration (s) | 53.500  | 0.008**   | 0.763     |
| <i>Mental Arithmetics</i><br><i>Interview</i> | Generic      | Head                   | Ang. Vel.         | CoV               | CoV               | 93      | 0.010*    | 0.646     |
|                                               |              | Upper Extremities      | Ang. Vel.         | Static Periods    | Mean Duration (s) | 93      | 0.010*    | 0.716     |
| <i>Mental Arithmetics</i><br><i>Interview</i> | Expert       | Total Body             | Ang. Vel.         | Static Periods    | Max. Duration (s) | 95      | 0.012*    | 0.703     |
|                                               |              | Upper Extremities      | Ang. Vel.         | Static Periods    | Ratio (%)         | 97      | 0.014*    | 0.569     |
| <i>Interview</i>                              | Expert       | Head                   | Ang. Vel.         | Static Periods    | Ratio (%)         | 97      | 0.014*    | 0.648     |
|                                               |              | Total Body             | Ang. Vel.         | Static Periods    | Max. Duration (s) | 99      | 0.017*    | 0.789     |
| <i>Mental Arithmetics</i><br><i>Interview</i> | Expert       | Total Body             | Ang. Vel.         | Static Periods    | Ratio (%)         | 102     | 0.022*    | 0.653     |
|                                               |              | Head                   | Ang. Vel.         | Mean              | Mean              | 102     | 0.022*    | -0.522    |
| <i>Interview</i>                              | Expert       | Upper Extremities      | Ang. Vel.         | Static Periods    | Max. Duration (s) | 104.500 | 0.028*    | 0.574     |
|                                               |              | Head                   | Ang. Vel.         | Static Periods    | Std. Duration (s) | 105     | 0.028*    | 0.977     |
|                                               | Trunk        | Velocity               | Static Periods    | Max. Duration (s) | 106               | 0.030*  | 0.956     |           |
|                                               | Head         | Ang. Vel.              | Static Periods    | Max. Duration (s) | 106.500           | 0.032*  | 0.879     |           |
| <i>Mental Arithmetics</i><br><i>Interview</i> | Expert       | T8                     | Ang. Vel.         | Static Periods    | Counts per Minute | 108     | 0.035*    | -0.535    |
|                                               |              | Head                   | Ang. Vel.         | Static Periods    | Max. Duration (s) | 108     | 0.035*    | 0.471     |
|                                               |              | Total Body             | Ang. Vel.         | Static Periods    | Mean Duration (s) | 109     | 0.038*    | 0.677     |

## Supplementary Table S6 Classification Results – *Main Study*

### Features over entire (f-)TSST

*Main Study*: Mean  $\pm$  standard deviation of classification performance metrics over the 5-fold model evaluation CV, trained on features extracted over the complete (f-)TSST, respectively. For each evaluated classifier, the classification pipeline combination with the highest mean accuracy is shown. The classification pipelines scoring the highest metrics are highlighted in **bold**.

| Scaler   | Feature Selection | Classifier | Accuracy [%]                     | F1-score [%]                     | Precision [%]                     |
|----------|-------------------|------------|----------------------------------|----------------------------------|-----------------------------------|
| Standard | SFM               | RF         | <b>71.6 <math>\pm</math> 5.9</b> | <b>71.2 <math>\pm</math> 4.2</b> | 75.1 $\pm$ 13.1                   |
| Min-Max  | RFE               | kNN        | 67.0 $\pm$ 8.4                   | 64.9 $\pm$ 11.2                  | 68.1 $\pm$ 8.5                    |
| Min-Max  | SkB               | MLP        | 66.8 $\pm$ 6.7                   | 62.4 $\pm$ 7.5                   | <b>75.4 <math>\pm</math> 14.8</b> |
| Min-Max  | RFE               | DT         | 65.2 $\pm$ 9.2                   | 65.9 $\pm$ 7.7                   | 66.3 $\pm$ 11.3                   |
| Min-Max  | SkB               | NB         | 64.1 $\pm$ 10.0                  | 57.3 $\pm$ 12.2                  | 70.3 $\pm$ 13.3                   |
| Standard | SkB               | Ada        | 63.0 $\pm$ 9.3                   | 61.9 $\pm$ 7.3                   | 66.3 $\pm$ 13.2                   |
| Min-Max  | SkB               | SVM        | 62.9 $\pm$ 5.6                   | 53.8 $\pm$ 11.9                  | 69.7 $\pm$ 7.0                    |



## References

- [1] R. Richer, V. Koch, A. Küderle, N. Rohleder, and B. Eskofier, "Dataset "Effect of acute psychosocial stress on body posture and movements" – Pilot Study." <https://osf.io/qvzdg>, Feb. 2023.
- [2] R. Richer, L. Abel, F. Hauck, M. Kurz, V. Ringgold, A. Küderle, L. Schindler-Gmelch, B. M. Eskofier, and N. Rohleder, "Dataset "Effect of acute psychosocial stress on body posture and movements" – Main Study." <https://osf.io/va6t3/>, Feb. 2024.
- [3] R. Richer, V. Koch, L. Abel, F. Hauck, M. Kurz, V. Ringgold, V. Müller, A. Küderle, L. Schindler-Gmelch, B. M. Eskofier, and N. Rohleder, "Stresspose-analysis - GitHub." <https://github.com/empkins/stresspose-analysis>, 2023.
